# Supplementary material
Source: MDPI journal article supplement (https://www.mdpi.com/2227-9717/10/9/1699)
Supplement: s1 [file s1]

**Supplement Table S1.** Temperature and pH growth profiles of *Rhodotorula* isolates during time

| Yeast isolate | Time (h)          |    |    |    |     |    |    |    |     |    |    |    |     |    |    |    |      |    |    |    |
|---------------|-------------------|----|----|----|-----|----|----|----|-----|----|----|----|-----|----|----|----|------|----|----|----|
|               | 24h               |    |    |    | 48h |    |    |    | 72h |    |    |    | 96h |    |    |    | 120h |    |    |    |
|               | Temperatures (°C) |    |    |    |     |    |    |    |     |    |    |    |     |    |    |    |      |    |    |    |
|               | 20                | 30 | 37 | 44 | 20  | 30 | 37 | 44 | 20  | 30 | 37 | 44 | 20  | 30 | 37 | 44 | 20   | 30 | 37 | 44 |
| top 30        | 3                 | 3  | 1  | 0  | 3   | 3  | 1  | 0  | 3   | 3  | 2  | 0  | 3   | 3  | 2  | 0  | 3    | 3  | 2  | 0  |
| KV1105        | 2                 | 3  | 0  | 0  | 3   | 3  | 0  | 0  | 3   | 3  | 0  | 0  | 3   | 3  | 0  | 0  | 3    | 3  | 0  | 0  |
| CRV           | 1                 | 1  | 0  | 0  | 2   | 1  | 0  | 0  | 2   | 3  | 0  | 0  | 3   | 3  | 0  | 0  | 3    | 3  | 0  | 0  |
| 4_34          | 2                 | 2  | 1  | 0  | 3   | 3  | 1  | 0  | 3   | 3  | 1  | 0  | 3   | 3  | 1  | 0  | 3    | 3  | 1  | 0  |
| FK3           | 1                 | 1  | 0  | 0  | 2   | 2  | 0  | 0  | 2   | 3  | 0  | 0  | 3   | 3  | 0  | 0  | 3    | 3  | 1  | 0  |

| Yeast isolate | Time (h) |   |   |   |    |   |   |   |    |   |   |   |    |   |   |   |     |   |   |   |
|---------------|----------|---|---|---|----|---|---|---|----|---|---|---|----|---|---|---|-----|---|---|---|
|               | 24       |   |   |   | 48 |   |   |   | 72 |   |   |   | 96 |   |   |   | 120 |   |   |   |
|               | pH       |   |   |   |    |   |   |   |    |   |   |   |    |   |   |   |     |   |   |   |
|               | 3        | 5 | 7 | 9 | 3  | 5 | 7 | 9 | 3  | 5 | 7 | 9 | 3  | 5 | 7 | 9 | 3   | 5 | 7 | 9 |
| top 30        | 1        | 2 | 2 | 0 | 1  | 3 | 2 | 1 | 2  | 3 | 3 | 1 | 2  | 3 | 3 | 1 | 3   | 3 | 3 | 1 |
| KV1105        | 0        | 1 | 2 | 0 | 0  | 2 | 2 | 1 | 1  | 3 | 2 | 1 | 1  | 3 | 3 | 1 | 1   | 3 | 3 | 1 |
| CRV           | 1        | 2 | 2 | 0 | 2  | 2 | 2 | 0 | 2  | 3 | 3 | 0 | 3  | 3 | 3 | 0 | 3   | 3 | 3 | 0 |
| 4_34          | 2        | 1 | 1 | 0 | 3  | 2 | 1 | 0 | 3  | 3 | 2 | 1 | 3  | 3 | 3 | 1 | 3   | 3 | 3 | 1 |
| FK3           | 0        | 2 | 2 | 0 | 0  | 3 | 3 | 1 | 1  | 3 | 3 | 1 | 2  | 3 | 3 | 1 | 3   | 3 | 3 | 1 |
